# Supplementary material for: Differences and Associations of NLRP3 Inflammasome Levels with Interleukins 1α, 1β, 33 and 37 in Adults with Prediabetes and Type 2 Diabetes Mellitus
Source: MDPI journal article supplement (doi:10.3390/biomedicines11051315), 2023-04-28
Supplement: s1 [file s1]

## Supplementary Data:

**Table S1.** Correlation analysis for Log-NLRP3 with other parameters ILs in different groups (HC, PD, T2DM).

| Parameters      | Overall | HC      | PD      | T2DM   |
|-----------------|---------|---------|---------|--------|
| IL-1 $\alpha$ # | 0       | -0.18 * | 0.45 ** | 0.12   |
| IL-1 $\beta$ #  | 0       | -0.12   | 0.03    | 0.35 * |
| IL-33#          | 0.38 ** | 0.41**  | 0.38 ** | 0.27 * |
| IL-37#          | 0.14 *  | 0.11    | 0.19    | 0.19   |

Note: Data presented (R) co-efficient. # represent Log-transformed variables. \* and \*\* denote *p*-values at 0.05 and 0.01 level, respectively.

**Table S2.** Correlation analysis for Log-NLRP3 with other parameters and ILs in males and females.

| Parameters      | Overall | Males   | Females |
|-----------------|---------|---------|---------|
| IL-1 $\alpha$ # | 0       | -0.12   | 0.16 *  |
| IL-1 $\beta$ #  | 0       | 0.15    | -0.08   |
| IL-33#          | 0.38 ** | 0.46 ** | 0.24 ** |
| IL-37#          | 0.14 *  | 0.02    | 0.16 *  |

Note: Data presented (R) co-efficient. # represented Log-transformed variables. \* and \*\* denote *p*-values at 0.05 and 0.01 level, respectively.
